# Supplementary material for: Bacterial Infections across the Ants: Frequency and Prevalence ofWolbachia, Spiroplasma, andAsaia
Source: Hindawi journal article supplement (doi:10.1155/2013/936341), 2013-01-01
Supplement: f2 [file 936341.f2.docx]

Kautz et al., Supplementary Figure Legends

Fig. S1. Phylogenetic tree of *Wolbachia* symbionts associated with ants and their closest relatives with sequence data available in GenBank.

Shown is a maximum likelihood phylogeny of the 16S rRNA region of bacterial symbionts. The host name is given together with the GenBank accession number (GenBank sequences) or collection code (sequences generated in the present study). *Rhizobium leguminosarum* was used as an outgroup.

Fig. S2. Phylogenetic tree of *Spiroplasma*-related ant-symbionts and their closest relatives with sequence data available in GenBank.

Shown is a maximum likelihood phylogeny of the 16S rRNA region of bacterial symbionts. The host name is given together with the GenBank accession number (GenBank sequences) or collection code (sequences generated in the present study). *Selenomonas ruminantium* was used as an outgroup.

Fig. S3. Phylogenetic tree of *Asaia-*related symbionts associated with ants and closest relatives with sequence data available in GenBank.

Shown is a maximum likelihood phylogeny of the 16S rRNA region of bacterial symbionts. The host name is given together with the GenBank accession number (GenBank sequences) or collection code (sequences generated in the present study). *Wolbachia pipentis* was used as an outgroup.

Kautz et al. Supplementary Fig. 1

Kautz et al. Supplementary Fig. 2 (previous page)

Kautz et al. Supplementary Fig. 3
